# Supplementary material
Source: PubMed Central journal article supplement (PMC3694390)

## **Supporting Information**

### **Supporting Figure Legends**

#### **Fig. S1. Vector exchange experiments**

(a) pTrc-S16 plasmid with the gene encoding essential ribosomal protein S16 cloned by the XhoI and SpeI sites of pTrc99A. (b)  $\Delta$ S16 deletion strain was electro-transformed with pTrc-S16 plasmid, recovered overnight in 2YT + 1mM IPTG and plated on LB agar containing 100ug/ml ampicillin, 1mM IPTG, and 5% sucrose for counter selection against the *sacB* marker. Surviving cells should contain the pTrc-S16, but have lost pCDSSara-S16. (c) Single colonies were picked from the counter selection plate and streaked on LB agar plates containing 100ug/ml ampicillin + 1mM IPTG, 100ug/ml ampicillin, or 50ug/ml spectinomycin + 0.2% arabinose. Efficiency of plasmid exchange was observed to be 100% among 27 colonies examined.

#### **Fig. S2. Deletion strategies.**

(a) Complete replacement of the gene. The target gene was completely replaced in-frame by a CAT gene (Cm<sup>r</sup>). (b) Partial replacement with preservation of the downstream Shine-Dalgarno (SD) sequence. When the SD sequence for the downstream gene in the same operon is embedded in the target gene, the corresponding region was preserved. Sequences of the genomic SD-containing regions are shown underneath the diagram. Gene names are indicated in parentheses, and the coding regions, including stop codons, are in capital letters. The CAT gene, SD sequences, and downstream gene are colored in green, orange, and cyan, respectively. The original stop codon for the target gene is underlined. (c) Partial replacement of the 3' portion of the target gene. The 3' portion of the target gene was replaced by a CAT gene expression cassette containing a TGA stop codon in-frame for the 5' fragment, a SD sequence, and a CAT gene. (d) Partial replacement of the 5' portion of the target gene. The 5' portion of the target gene was replaced by a CAT gene followed by a SD sequence and an ATG start codon for the 3' fragment of the target gene.

**Fig. S3. PCR analysis of genomic recombination.**

(a) A schematic view of the genomic region targeted for recombination. Black arrows represent genomic sites that anneal primers used in this analysis. (b–d) Agarose gel electrophoresis images of PCR products with primer pairs *a* and *c* (b), *b* and *d* (c), and *a* and *d* (d) shown in panel A on all deletion mutants. D, deletion mutant; C, DH10B control; M, size marker.

**Fig. S4. PCR analysis of knockout mutants deprived of a complementing plasmid.**

(a) Design of primers to analyze the presence of the genomic recombination and the absence of the target gene. Black arrows represent genomic sites that anneal to primers used in this analysis. Each primer pair is numbered as indicated. (b) Agarose gel electrophoresis images of PCR products with primer pairs 1-4 on all knockout mutants lacking a complementing plasmid.

**Fig. S5. Quantitative mass spectrometry analysis of ribosomal protein truncations.**

(a) Relative abundance of all 30S proteins found within 70S ribosomes isolated from  $\Delta$ L5 cells expressing (L5 $\Delta$ 70-83) in green,  $\Delta$ L27 cells expressing (L27N $\Delta$ 16) in red,  $\Delta$ L27 cells expressing (L27N $\Delta$ 20) in blue, and  $\Delta$ S19 cells expressing (S19C $\Delta$ 16) in yellow. (b) Relative abundance of all 50S proteins found within 70S ribosomes isolated from  $\Delta$ L5 cells expressing (L5 $\Delta$ 70-83) in green,  $\Delta$ L27 cells expressing (L27N $\Delta$ 16) in red,  $\Delta$ L27 cells expressing (L27N $\Delta$ 20) in blue, and  $\Delta$ S19 cells expressing (S19C $\Delta$ 16) in yellow.

## Supporting Figures

Fig. S1

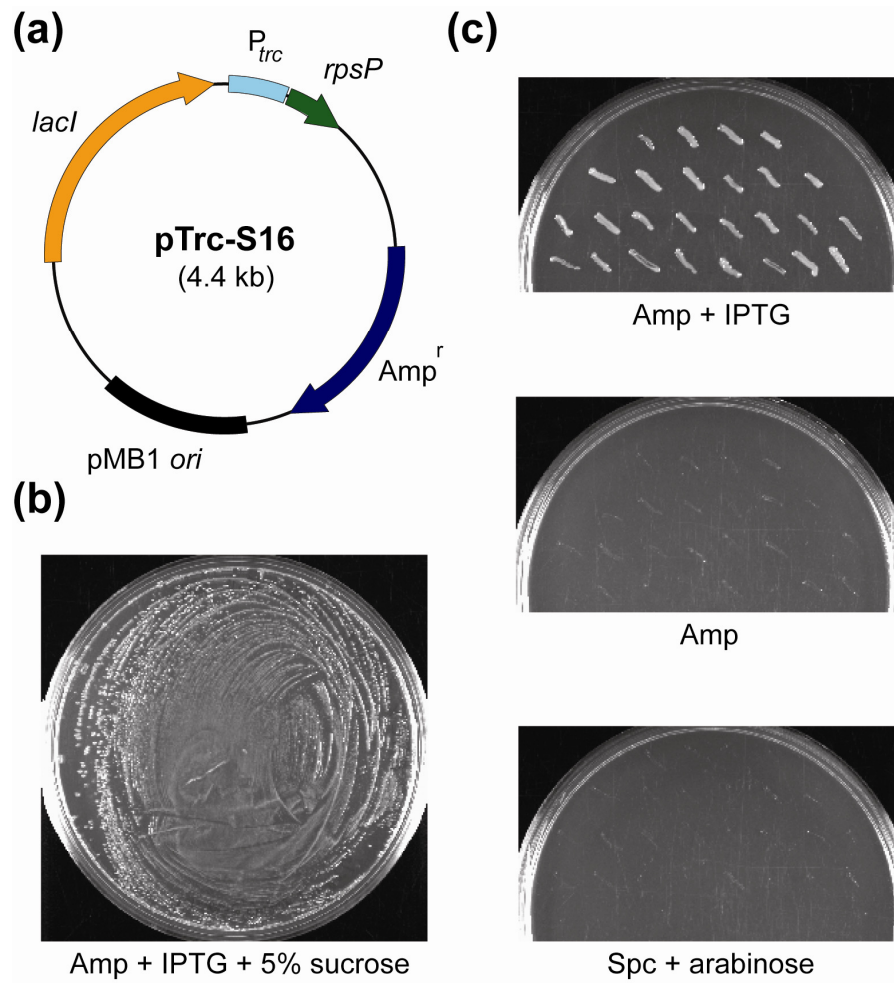

**Fig. S2**

**(a) Complete replacement**

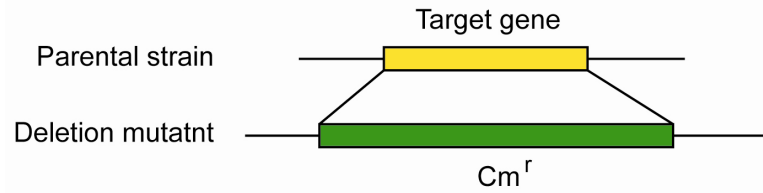

**(b) Preservation of downstream SD**

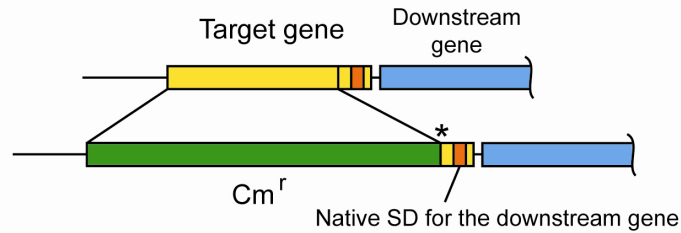

$\Delta rplD$  pL4: ... (cat) TAAgttgaggagatgctggcATGATT (rplW) ...  
 $\Delta rplO$  pL15: ... (cat) TAAtcgaggaataagtagcagATGGC (secY) ...  
 $\Delta rpmD$  pL30: ... (cat) TAAgaggagtaagagATGCGTTAAA (rplO) ...  
 $\Delta rpsE$  pS5: ... (cat) TAActggggaataaaccATGGCAA (rpmD) ...

**(c) 3' replacement**

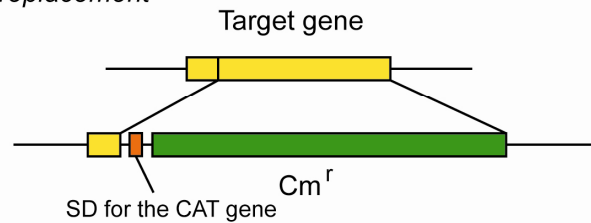

... (target 5') TGAgattttcaggagctaaggaagctaaaATG (cat) ...

**(d) 5' replacement**

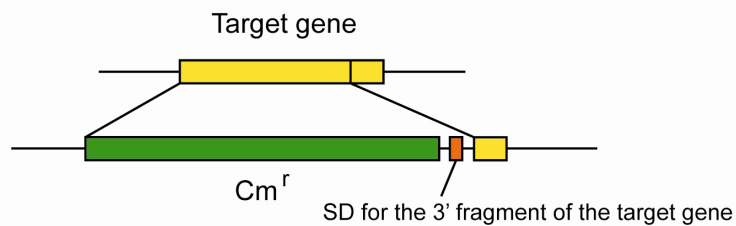

... (cat) TAAcataaggaggtcgcaaATG (target 3') ...

**Fig. S3**

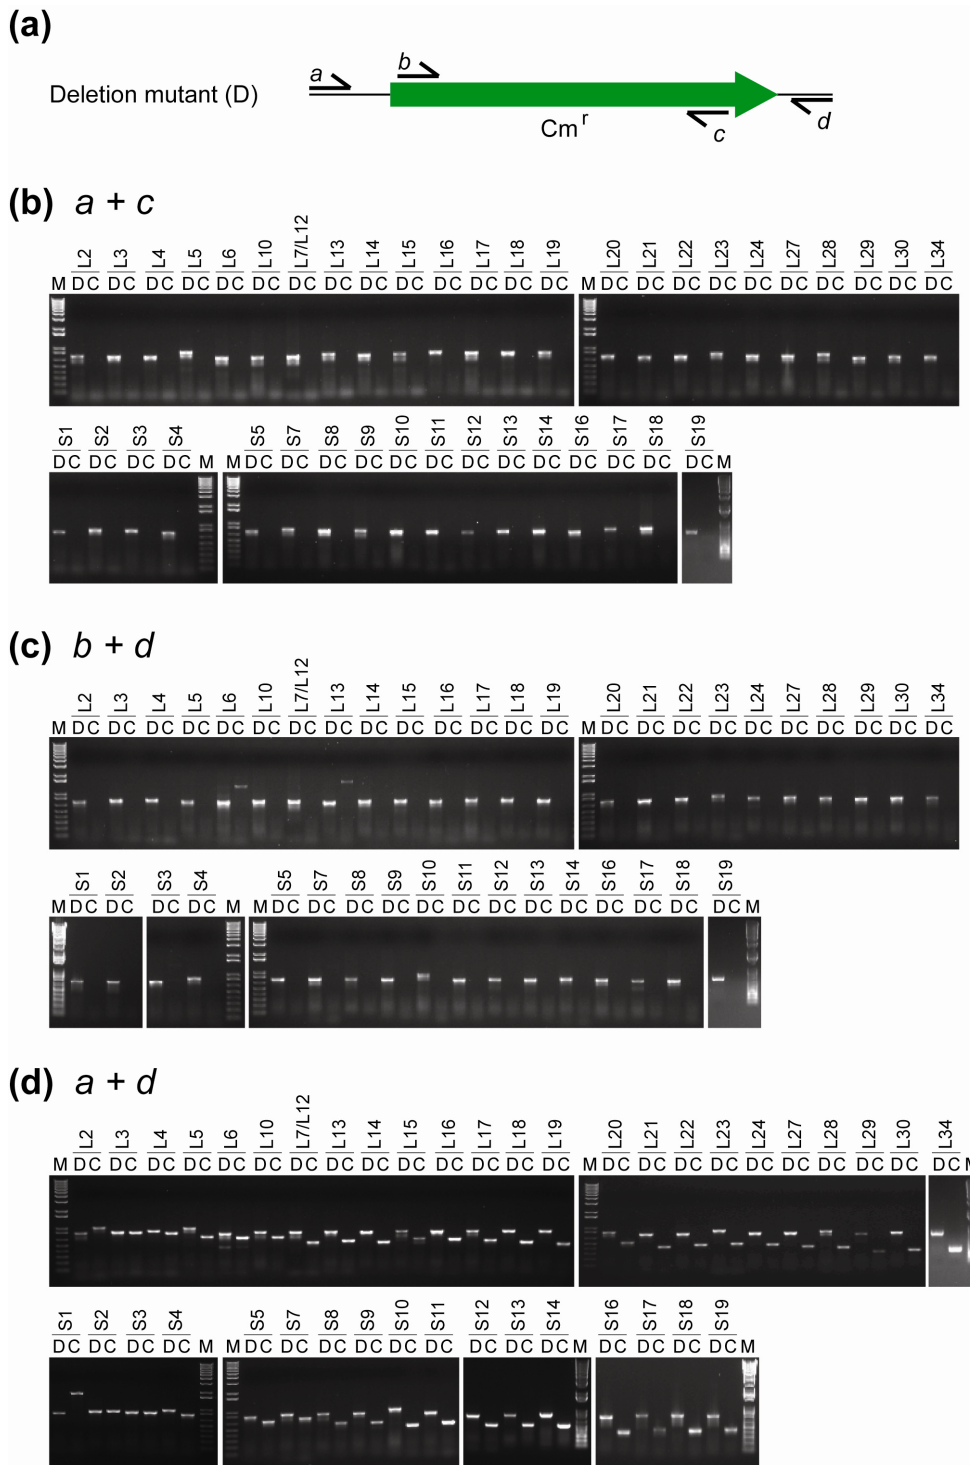

**Fig. S4**

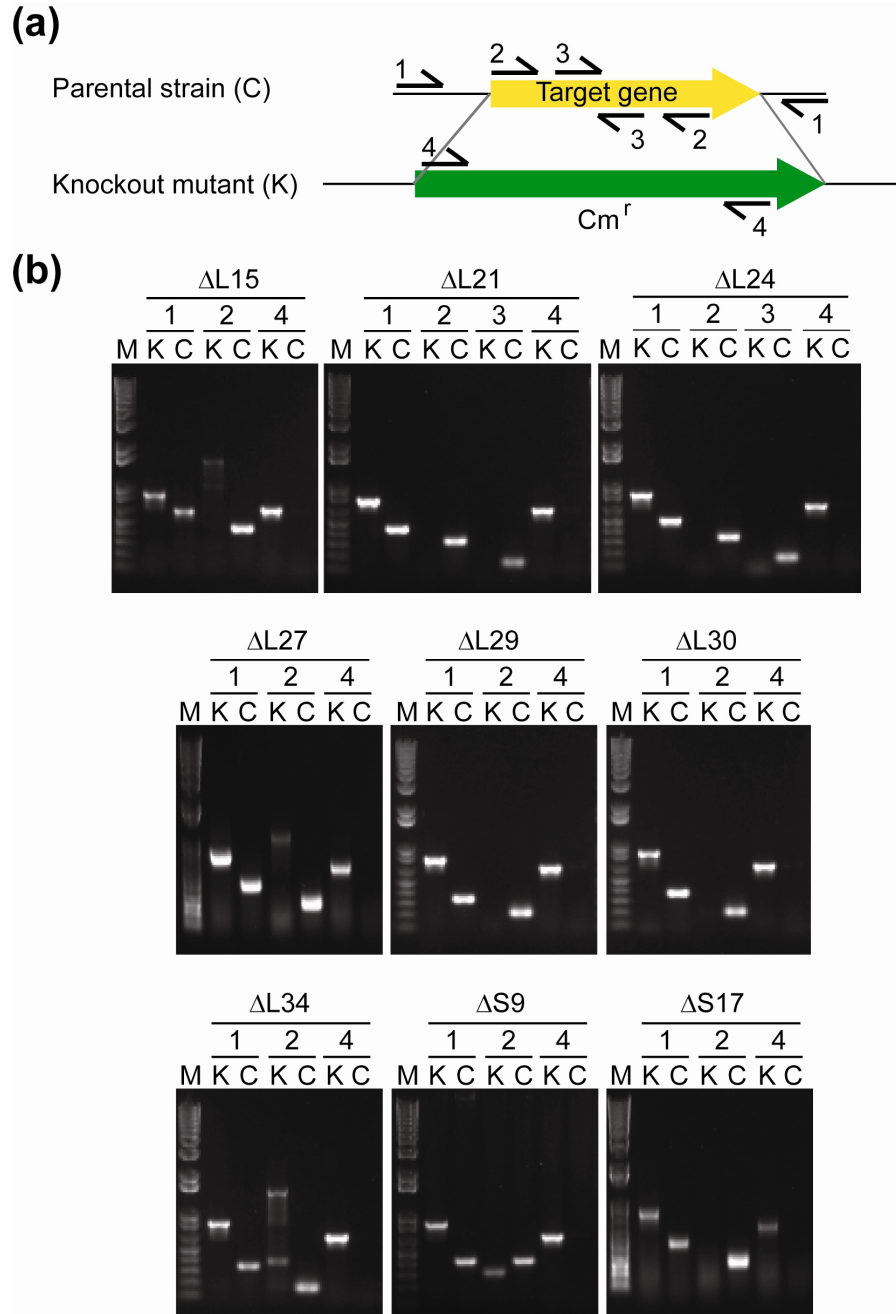

Fig. S5

(a)

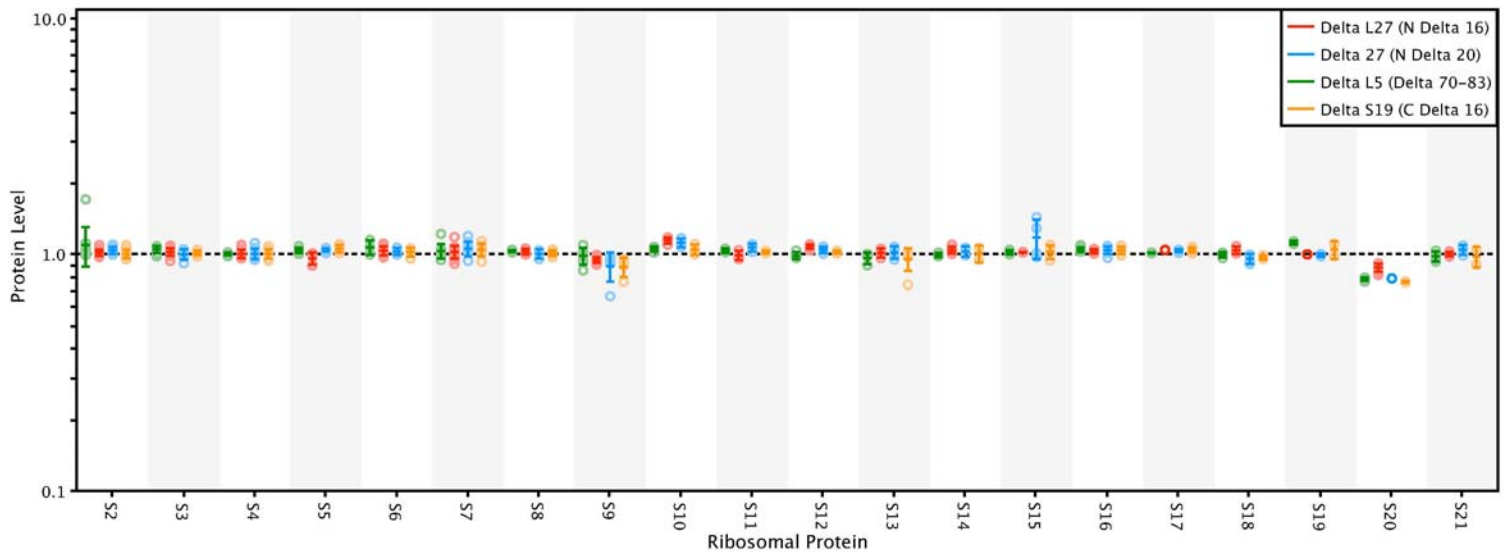

(b)

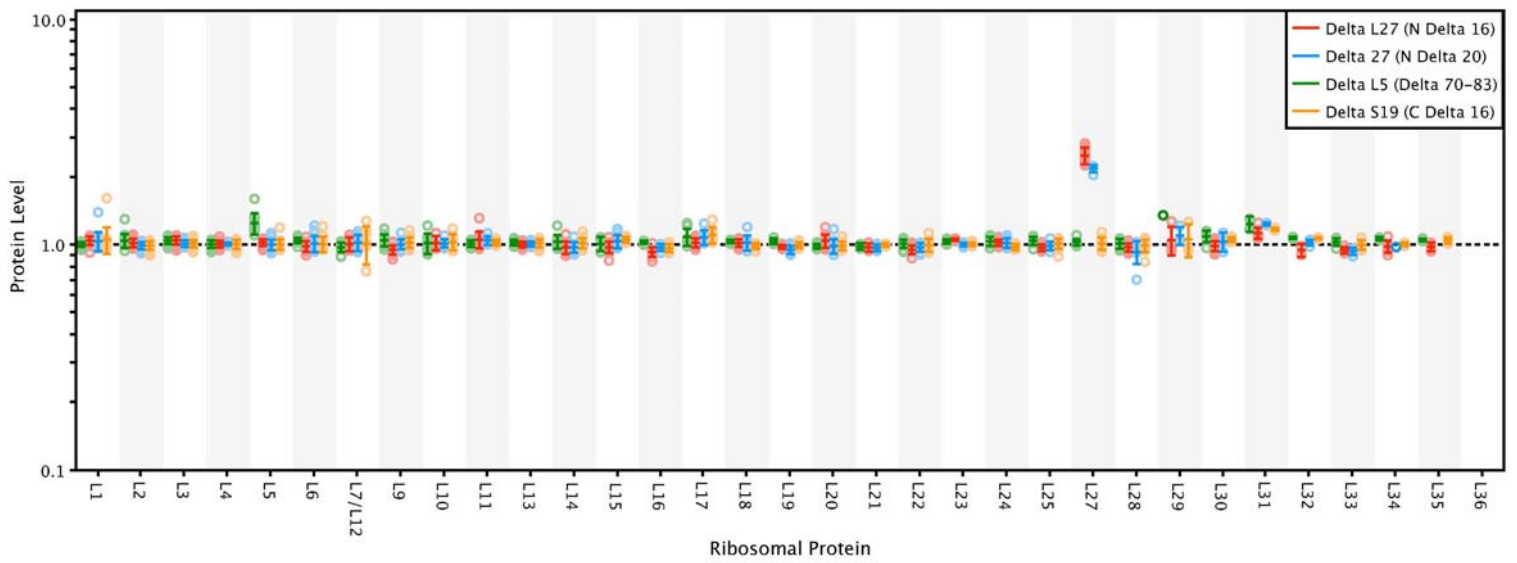

Supplement: NIHMS325408-supplement-01.pdf [file NIHMS325408-supplement-01.pdf]
